# Supplementary material for: Neuroprotective effects of NDEELNK from sea cucumber ovum against scopolamine-induced PC12 cell damage through enhancing energy metabolism and upregulation of the PKA/BDNF/NGF signaling pathway
Source: Royal Society of Chemistry journal article supplement (doi:10.1039/d1fo00631b), 2021-01-01
Supplement: d1fo00631b1.xlsx [file d1fo00631b1.xlsx]

## Sheet: WB
	actin-1(1)-Q12345678		actin-2(1)-Q12345678		actin-3(1)-Q12345678
	BDNF-2(1)-Q12345678		BDNF-3(1)-H12345678		BDNF-4(3)-H12345678
	NGF-1(1)-Q12345678		NGF-2(1)-H12345678		NGF-3(1)-H12345678
	P-PKA-2(1)Q12345678		P-PKA-4(1)H12345678		P-PKA-6(1)H12345678
	There are 8 bands in each figure. From left to right, the bands are defined as 1, 2, 3, 4, 5, 6, 7 and 8, respectively. The bands with red numbers are the bands of this sample (NDEELNK).
